# Supplementary material for: Is it Possible to Mechanical Recycle the Materials of the Disposable Filtering Masks?
Source: PubMed Central journal article supplement (PMC7698554; doi:10.3390/polym12112726), 2020-11-17
Supplement: polymers-12-02726-s001.pdf [file polymers-12-02726-s001.pdf]

Article

# Is it Possible to Mechanical Recycle the Materials of the Disposable Filtering Masks?

Daniele Battagazzore \*, Fulvia Cravero and Alberto Frache

Dipartimento di Scienza Applicata e Tecnologia, Politecnico di Torino, Alessandria site,  
Viale Teresa Michel 5, 15121 Alessandria, Italy; fulvia.cravero@polito.it (F.C.); alberto.frache@polito.it (A.F.)

\* Correspondence: daniele.battagazzore@polito.it, Tel/Fax: +390131229343/+390131229399

## Supporting Information

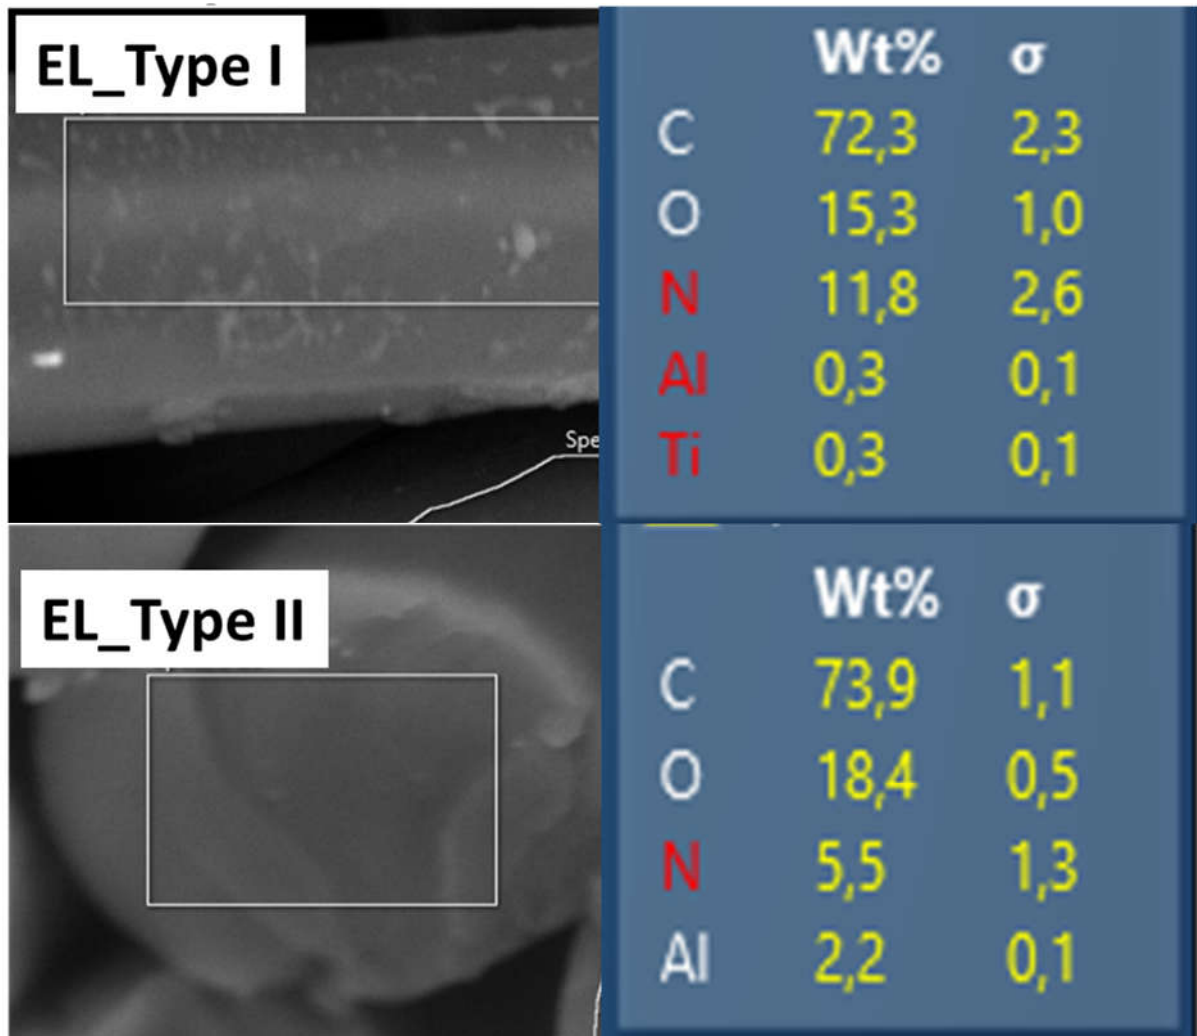

Figure S1. EDX of EL\_Type I and EL\_Type II.

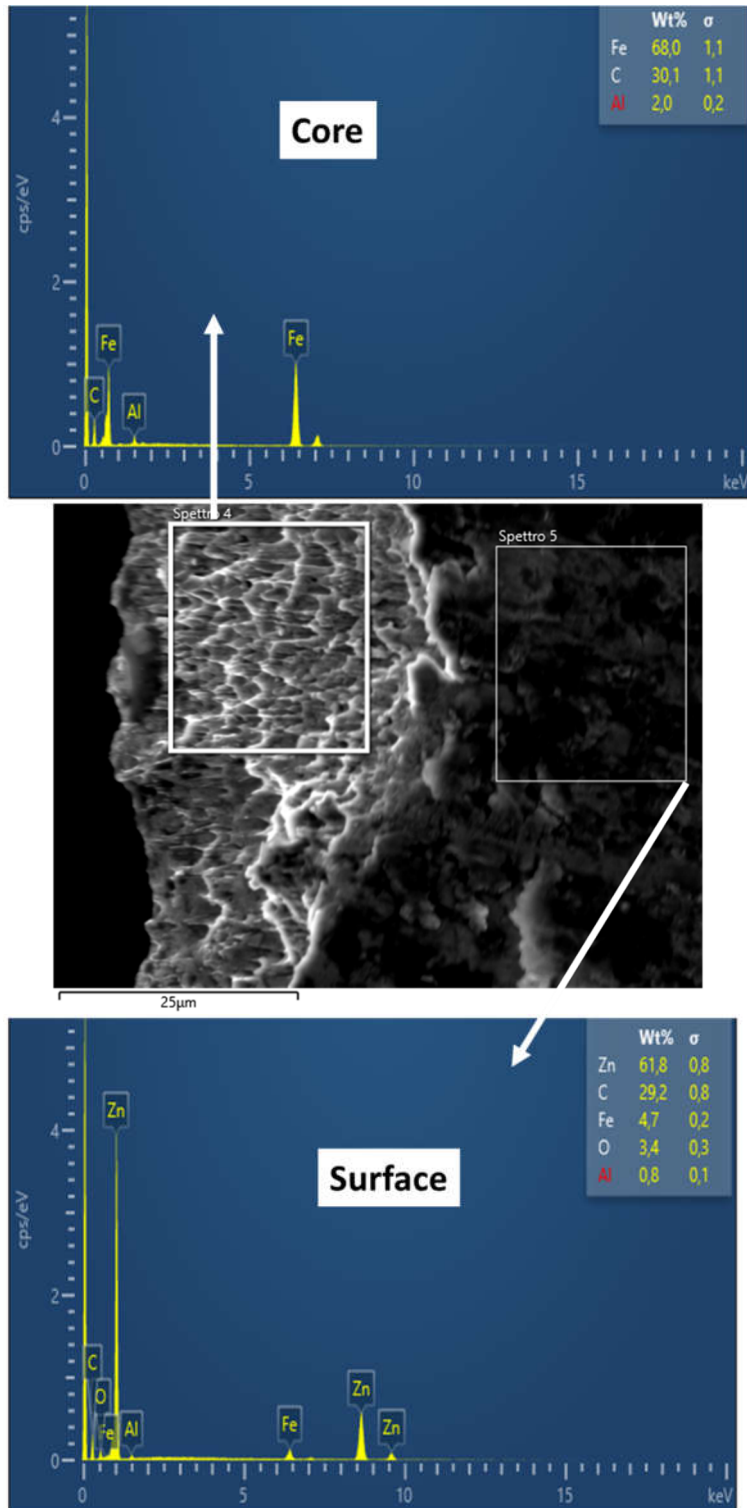

Figure S2. EDX of NW.

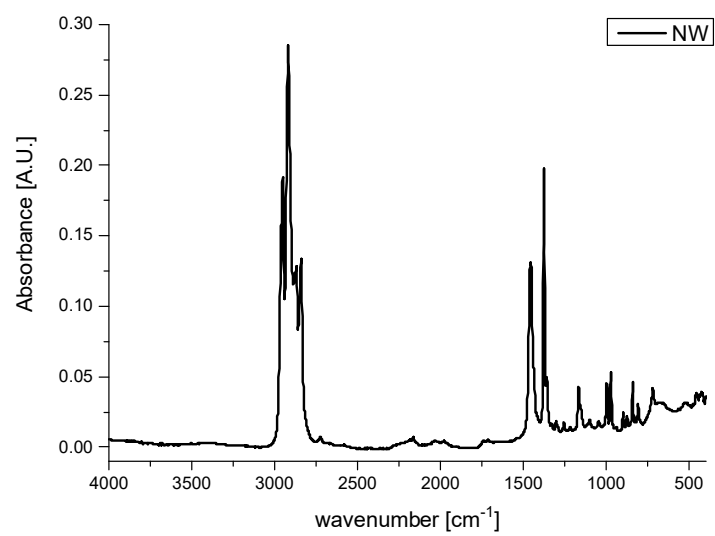

**Figure S3.** ATR of the surface of the NW.
